# Supplementary material
Source: PubMed Central journal article supplement (PMC4455270)
Supplement: JB.00197-15_zjb999093650so7.pdf [file JB.00197-15_zjb999093650so7.pdf]

Table S7. Physiological Properties of *P. temperata* NC19 mutants and their parental wild type.

|                          | <u>Swim Ring Formation</u> <sup>1</sup> |           | <u>Swarm Ring Formation</u> <sup>2</sup> | <u>Insect Mortality</u> <sup>4</sup> |                   | <u>Symbiosis</u> <sup>5</sup> | <u>Dye Absorption</u> <sup>6</sup> |      |     | <u>Extracellular Products</u> <sup>7</sup> |       |           |                         | <u>Pigmentation</u> |
|--------------------------|-----------------------------------------|-----------|------------------------------------------|--------------------------------------|-------------------|-------------------------------|------------------------------------|------|-----|--------------------------------------------|-------|-----------|-------------------------|---------------------|
|                          | + NaCl                                  | - NaCl    |                                          | LT <sub>50</sub>                     | LT <sub>100</sub> |                               | EB                                 | NTBA | Mac | Protease                                   | DNase | Hemolytic | Antibiotic <sup>e</sup> | PP3                 |
|                          |                                         |           |                                          |                                      |                   |                               |                                    |      |     |                                            |       |           |                         |                     |
| <b><u>Wild type</u></b>  |                                         |           |                                          |                                      |                   |                               |                                    |      |     |                                            |       |           |                         |                     |
| NC 19 Primary (Parental) | 36.9 ± 3.3                              | 3.0 ± 0.0 | 10.7 ± 1.5                               | 38                                   | 46                | +                             | +                                  | +    | +   | ++                                         | ++    | +         | +                       | Dark                |
| NC 19 Secondary          | 3.0 ± 0.0                               | 3.0 ± 0.0 | N.D. <sup>3</sup>                        | 35                                   | 43                | -                             | -                                  | -    | -   | +                                          | +     | -         | -                       | Light               |
| <b><u>Non-motile</u></b> |                                         |           |                                          |                                      |                   |                               |                                    |      |     |                                            |       |           |                         |                     |
| P3-C8                    | 3.0 ± 0.0                               | 3.0 ± 0.0 | 11.0 ± 1.1                               | +                                    | +                 | +                             | +                                  | +    | +   | ++                                         | ++    | +         | +                       | Dark                |
| P4-27                    | 3.0 ± 0.0                               | 3.0 ± 0.0 | 10.0 ± 1.1                               | delay                                | delay             | +                             | +                                  | +    | +   | ++                                         | +     | +         | +                       | Dark                |
| P4 C8                    | 3.0 ± 0.0                               | 3.0 ± 0.0 | 11.0 ± 1.1                               | +                                    | +                 | +                             | +                                  | +    | +   | ++                                         | ++    | +         | +                       | Dark                |
| P5-G7                    | 3.0 ± 0.0                               | 3.0 ± 0.0 | 10.0 ± 1.0                               | +                                    | +                 | +                             | +                                  | +    | +   | ++                                         | +     | +         | +                       | Dark                |
| P7 F6                    | 3.0 ± 0.0                               | 3.0 ± 0.0 | 10.0 ± 1.0                               | +                                    | +                 | +                             | +                                  | +    | +   | ++                                         | +     | +         | +                       | Dark                |
| P12 -18                  | 3.0 ± 0.0                               | 3.0 ± 0.0 | 10.0 ± 1.1                               | +                                    | +                 | +                             | +                                  | +    | +   | ++                                         | +     | +/-       | +                       | Dark                |
| P20 F12                  | 3.0 ± 0.0                               | 3.0 ± 0.0 | 9.0 ± 1.0                                | enhan                                | enhan             | +                             | +                                  | +    | +   | ++                                         | ++    | -         | +                       | Dark                |
| P26 E6                   | 3.0 ± 0.0                               | 3.0 ± 0.0 | 7.0 ± 1.1                                | +                                    | +                 | +                             | +                                  | +    | +   | ++                                         | ++    | -         | +                       | Dark                |

|                                  |               |               |                |       |       |   |     |     |   |     |    |   |    |       |
|----------------------------------|---------------|---------------|----------------|-------|-------|---|-----|-----|---|-----|----|---|----|-------|
| P26-E8                           | $3.0 \pm 0.0$ | $3.0 \pm 0.0$ | $8.0 \pm 1.1$  | +     | +     | + | +   | +   | + | ++  | ++ | + | +  | Dark  |
| P30-B7                           | $3.0 \pm 0.0$ | $3.0 \pm 0.0$ | $9.0 \pm 1.1$  | +     | +     | + | +   | +   | + | ++  | +  | + | +  | Dark  |
| P39-C1                           | $3.0 \pm 0.0$ | $3.0 \pm 0.0$ | $10.0 \pm 1.1$ | +     | +     | + | +   | +   | + | ++  | ++ | + | +  | Dark  |
| P39E6                            | $3.0 \pm 0.0$ | $3.0 \pm 0.0$ | $11.0 \pm 1.1$ | +     | +     | + | +   | +   | + | ++  | ++ | + | +  | Dark  |
| P41 G10                          | $4.0 \pm 0.5$ | $3.0 \pm 0.0$ | $8.0 \pm 1.1$  | +     | +     | + | +   | +   | + | ++  | ++ | + | +  | Dark  |
| P59 D11                          | $3.0 \pm 0.0$ | $3.0 \pm 0.0$ | $9.0 \pm 1.1$  | +     | +     | + | +   | +   | + | ++  | ++ | + | ++ | Dark  |
| P59-G8                           | $3.0 \pm 0.0$ | $3.0 \pm 0.0$ | $8.0 \pm 1.1$  | +     | +     | + | +   | +   | + | ++  | +  | + | +  | Dark  |
| P72-C6                           | $2.0 \pm 0.0$ | $2.0 \pm 0.0$ | $7.8 \pm 1.1$  | +     | +     | + | +   | +   | + | ++  | ++ | + | ++ | Dark  |
| P76-H11                          | $3.0 \pm 0.0$ | $3.0 \pm 0.0$ | $11.0 \pm 1.1$ | +     | +     | + | +   | +   | + | +++ | +  | + | +  | Dark  |
| P84-B1                           | $3.0 \pm 0.0$ | $3.0 \pm 0.0$ | $10.0 \pm 1.0$ | +     | +     | + | +   | +   | + | ++  | ++ | + | +  | Dark  |
| P84-H2                           | $3.0 \pm 0.0$ | $3.0 \pm 0.0$ | $10.0 \pm 1.1$ | +     | +     | + | +   | +   | + | ++  | ++ | + | +  | Dark  |
| P86-G6                           | $3.0 \pm 0.0$ | $3.0 \pm 0.0$ | $9.0 \pm 1.1$  | delay | delay | + | +   | +   | + | +++ | +  | + | ++ | Dark  |
| P87-G4                           | $4.0 \pm 0.0$ | $3.0 \pm 0.0$ | $9.0 \pm 1.1$  | +     | +     | - | +   | +   | + | ++  | ++ | + | +  | Dark  |
| P88-D7                           | $3.0 \pm 0.0$ | $3.0 \pm 0.0$ | $11.0 \pm 1.0$ | +     | +     | + | +   | +   | + | +++ | +  | + | ++ | Dark  |
| P90-G1                           | $1.3 \pm 0.6$ | $3.0 \pm 0.6$ | $12.3 \pm 4.0$ | +     | +     | + | +   | +   | + | ++  | +  | + | +  | Dark  |
| <b><u>Defective Motility</u></b> |               |               |                |       |       |   |     |     |   |     |    |   |    |       |
| P5-11                            | $8.0 \pm 1.1$ | $1.0 \pm 0.0$ | $10.0 \pm 1.2$ | +     | +     | + | -/+ | -/+ | - | ++  | +  | - | -  | Light |

|                                   |            |             |            |       |       |       |     |     |     |     |    |     |     |       |
|-----------------------------------|------------|-------------|------------|-------|-------|-------|-----|-----|-----|-----|----|-----|-----|-------|
| P13-7                             | 18.7 ± 1.5 | 1.0 ± 0.0   | 15.0 ± 1.7 | delay | delay | +     | -   | -   | -   | -   | ++ | -   | -   | Light |
| P28-A10                           | 22.0 ± 1.1 | 3.0 ± 0.0   | 11.0 ± 1.1 | +     | +     | +     | +   | +   | +   | +++ | ++ | +   | +/- | Dark  |
| P31-B7                            | 18.0 ± 1.3 | 3.0 ± 0.0   | 9.0 ± 1.0  | +     | +     | +     | +   | +   | +   | ++  | ++ | +   | +   | Dark  |
| P31-B12                           | 11.0 ± 1.1 | 3.0 ± 0.0   | 12.0 ± 1.3 | +     | +     | +     | +   | +   | +   | ++  | ++ | +   | +   | Dark  |
| P43-B3                            | 5.0 ± 2.0  | 3.0 ± 0.0   | 8.0 ± 1.1  | +     | +     | +     | +   | +   | +   | +++ | ++ | +   | +   | Dark  |
| P47-F1                            | 5.0 ± 1.5  | 3.0 ± 0.0   | 8.0 ± 1.1  | +     | +     | +     | +   | +   | +   | ++  | ++ | +   | +   | Dark  |
| P58-C8                            | 5.0 ± 2.0  | 3.0 ± 0.0   | 10.0 ± 1.0 | enhan | enhan | enhan | +   | +   | +   | ++  | ++ | +   | +   | Dark  |
| P64-C3                            | 18.0 ± 1.2 | 3.0 ± 0.0   | 12.0 ± 1.1 | +     | +     | delay | -   | -   | -   | ++  | ++ | +   | +   | Dark  |
| P64-D5                            | 10.0 ± 1.1 | 3.0 ± 0.0   | 15.0 ± 1.1 | delay | delay | +     | -   | -   | -   | ++  | ++ | +   | +   | Dark  |
| P88-D8                            | 22.0 ± 1.4 | 3.0 ± 0.0   | 15.0 ± 1.1 | +     | +     | +     | -/+ | -/+ | -/+ | ++  | ++ | +   | +/- | Dark  |
| P84-E4                            | 12.0 ± 1.1 | 3.0 ± 0.0   | 8.0 ± 1.1  | +     | +     | +     | +   | +   | +   | ++  | +  | +   | +/- | Dark  |
| <b><u>Swim –NaCl motility</u></b> |            |             |            |       |       |       |     |     |     |     |    |     |     |       |
| P1-4                              | 48.3 ± 6.1 | 37.7 ± 4.0  | 10.3 ± 4.0 | +     | +     | +     | +   | +   | +   | ++  | ++ | +   | +   | Dark  |
| P4-9                              | 42.3 ± 4.9 | 20.0 ± 3.0  | 25.3 ± 2.5 | +     | +     | +     | +   | +   | +   | ++  | ++ | +   | +   | Dark  |
| P6-22                             | 42.7 ± 2.6 | 30.0 ± 10.0 | 10.7 ± 2.9 | +     | +     | +     | +   | +   | +   | ++  | +  | +/- | +   | Dark  |
| P30-H5                            | 27.0 ± 3.0 | 27.0 ± 2.5  | 15.6 ± 2.5 | +     | +     | +     | +   | +   | +   | ++  | ++ | +/- | +   | Dark  |

|                             |                |                |                      |       |       |       |   |   |   |     |    |     |    |       |
|-----------------------------|----------------|----------------|----------------------|-------|-------|-------|---|---|---|-----|----|-----|----|-------|
| P56-C3                      | $42.0 \pm 4.4$ | $35.3 \pm 4.1$ | $10.8 \pm 3.3$       | +     | +     | +     | + | + | + | ++  | ++ | +/- | +  | Dark  |
| <b><u>Hyperswarmers</u></b> |                |                |                      |       |       |       |   |   |   |     |    |     |    |       |
| P2-A9                       | $43.3 \pm 3.5$ | $9.3 \pm 0.6$  | $48.3 \pm 5.8$       | +     | +     | +     | + | + | + | ++  | ++ | +   | +  | Dark  |
| P5-A7                       | $36.0 \pm 3.6$ | $6.2 \pm 0.6$  | $22.5 \pm 3.5$       | +     | +     | +     | + | + | + | ++  | ++ | +   | +  | Light |
| P7-A8                       | $40.3 \pm 2.5$ | $1.0 \pm 0.0$  | $20.3 \pm 0.6$       | +     | +     | +     | + | + | + | ++  | ++ | +   | +  | Dark  |
| P7-A11                      | $41.3 \pm 1.2$ | $3.3 \pm 0.6$  | $74.0 \pm 3.6$       | +     | +     | +     | + | + | + | ++  | ++ | +   | +  | Dark  |
| P8-C2                       | $27.0 \pm 2.6$ | $3.4 \pm 3.4$  | $69.4 \pm$<br>$13.4$ | +     | +     | +     | + | + | + | +++ | +  | +   | +  | Dark  |
| P8-H6                       | $35.2 \pm 4.5$ | $2.0 \pm 0.6$  | $18.7 \pm 4.8$       | +     | +     | +     | + | + | + | +++ | ++ | +   | +  | Dark  |
| P11-A2                      | $43.3 \pm 1.2$ | $3.7 \pm 0.6$  | $66.7 \pm 6.4$       | +     | +     | +     | + | + | + | +++ | ++ | +   | +  | Dark  |
| P11-A6                      | $53.0 \pm 1.5$ | $3.0 \pm 1.0$  | $51.0 \pm$<br>$55.0$ | +     | +     | +     | + | + | + | ++  | ++ | +   | ++ | Dark  |
| P12-A1                      | $37.3 \pm 0.6$ | $7.0 \pm 2.6$  | $79.4 \pm 3.4$       | delay | delay | enhan | + | + | + | ++  | +  | +   | ++ | Dark  |
| P14-G2                      | $24.0 \pm 3.4$ | $20.0 \pm 5.2$ | $23.0 \pm 1.7$       | +     | +     | +     | + | + | + | ++  | ++ | +   | +  | Dark  |
| P20-D5                      | $45.0 \pm 3.4$ | $20.0 \pm 3.4$ | $27.7 \pm 2.5$       | +     | +     | +     | + | + | + | ++  | ++ | +/- | +  | Dark  |
| P38-B11                     | $36.3 \pm 1.5$ | $2.7 \pm 0.6$  | $16.5 \pm 4.9$       | +     | +     | +     | + | + | + | ++  | +  | +   | +  | Dark  |
| P38-F2                      | $18.0 \pm 3.4$ | $6.0 \pm 1.4$  | $45.0 \pm 3.2$       | +     | +     | +     | + | + | + | ++  | +  | +   | +  | Dark  |
| P46-G10                     | $40.9 \pm 1.7$ | $2.7 \pm 0.6$  | $30.0 \pm 5.6$       | +     | +     | +     | + | + | + | +++ | +  | +   | +  | Dark  |

|         |                |                 |                 |       |       |       |   |   |   |     |    |     |    |       |
|---------|----------------|-----------------|-----------------|-------|-------|-------|---|---|---|-----|----|-----|----|-------|
| P50-A6  | $42.0 \pm 1.0$ | $3.0 \pm 1.0$   | $36.7 \pm 5.8$  | delay | delay | +     | + | + | + | +++ | +  | +   | ++ | Dark  |
| P57-G9  | $29.0 \pm 6.5$ | $20.7 \pm 0.6$  | $69.0 \pm 7.9$  | +     | +     | +     | + | + | + | ++  | +  | +   | ++ | Dark  |
| P61-A3  | $29.0 \pm 3.4$ | $7.0 \pm 3.4$   | $22.6 \pm 2.6$  | +     | +     | +     | + | - | - | -   | ++ | +/- | -  | Light |
| P63-H9  | $29.0 \pm 3.4$ | $80.0 \pm 0.0$  | $55.4 \pm 3.9$  | +     | +     | +     | + | + | + | ++  | ++ | +   | +  | Dark  |
| P64-B10 | $32.0 \pm 4.5$ | $9.0 \pm 3.2$   | $80.0 \pm 0.0$  | +     | +     | +     | + | + | + | +++ | +  | +   | ++ | Dark  |
| P78-C2  | $49.0 \pm 0.6$ | $50.0 \pm 13.4$ | $24.9 \pm 11.8$ | +     | +     | +     | + | + | + | +++ | ++ | +   | +  | Dark  |
| P80-G7  | $38.3 \pm 2.6$ | $25.0 \pm 3.5$  | $55.0 \pm 5.5$  | +     | +     | +     | + | + | + | ++  | +  | +   | +  | Dark  |
| P81-G6  | $45.3 \pm 2.9$ | $3.7 \pm 0.6$   | $53.3 \pm 30.5$ | +     | +     | -     | + | + | + | ++  | +  | +   | +  | Dark  |
| P81-G7  | $51.5 \pm 5.9$ | $7.8 \pm 1.3$   | $3.7 \pm 0.6$   | +     | +     | +     | + | + | + | ++  | +  | +   | -  | Dark  |
| P81-H5  | $31.3 \pm 1.2$ | $3.7 \pm 0.6$   | $31.0 \pm 3.6$  | +     | +     | +     | + | + | + | +++ | +  | +   | +  | Dark  |
| P81-H7  | $33.0 \pm 0.6$ | $8.0 \pm 2.6$   | $68.0 \pm 10.4$ | +     | +     | delay | + | + | + | ++  | +  | +   | +  | Dark  |
| P81-H8  | $58.6 \pm 3.0$ | $19.0 \pm 1.7$  | $67.0 \pm 19.0$ | +     | +     | +     | + | + | + | ++  | +  | +   | +  | Dark  |
| P82-A5  | $27.0 \pm 3.4$ | $3.0 \pm 0.0$   | $80.0 \pm 0.0$  | +     | +     | +     | + | + | + | +   | +  | +   | +  | Dark  |
| P82-B9  | $52.9 \pm 4.5$ | $1.7 \pm 2.8$   | $16.7 \pm 4.7$  | +     | +     | +     | + | + | + | ++  | +  | +   | +  | Dark  |
| P82-G9  | $40.0 \pm 3.4$ | $14.0 \pm 5.2$  | $25.3 \pm 3.2$  | +     | +     | +     | + | + | + | ++  | +  | +   | +  | Dark  |

|                             |                |                |                 |       |       |   |     |   |   |     |    |     |    |       |
|-----------------------------|----------------|----------------|-----------------|-------|-------|---|-----|---|---|-----|----|-----|----|-------|
| P83-A9                      | $35.0 \pm 3.0$ | $10.0 \pm 3.4$ | $41.7 \pm 5.8$  | delay | delay | + | +   | + | + | ++  | +  | +   | +  | Dark  |
| P83-B10                     | $64.0 \pm 2.0$ | $14.7 \pm 1.5$ | $69.0 \pm 7.9$  | enhan | enhan | + | +   | + | + | +++ | +  | +   | ++ | Dark  |
| P83-H5                      | $27.0 \pm 3.4$ | $10.0 \pm 4.8$ | $70.0 \pm 6.4$  | +     | +     | + | +   | + | + | ++  | ++ | +   | +  | Dark  |
| P90-G8                      | $45.1 \pm 5.2$ | $6.0 \pm 0.0$  | $22.0 \pm 5.3$  | +     | +     | + | +   | + | + | ++  | +  | +   | +  | Dark  |
| <b><u>Hyperswimmers</u></b> |                |                |                 |       |       |   |     |   |   |     |    |     |    |       |
| P2-H12                      | $47.0 \pm 3.4$ | $3.0 \pm 0.0$  | $50.0 \pm 16.4$ | +     | +     | + | +   | + | + | ++  | +  | -   | +  | Dark  |
| P5-2                        | $45.0 \pm 4.3$ | $3.0 \pm 0.0$  | $12.7 \pm 1.2$  | +     | +     | + | +   | + | + | ++  | ++ | +   | +  | Dark  |
| P7-E1                       | $44.0 \pm 2.4$ | $3.0 \pm 0.0$  | $25.0 \pm 3.4$  | +     | +     | + | +   | + | + | ++  | ++ | +/- | +  | Dark  |
| P8-D3                       | $42.0 \pm 1.1$ | $4.3 \pm 0.6$  | $12.0 \pm 3.4$  | +     | +     | + | +   | + | + | +++ | ++ | +   | +  | Dark  |
| P10-D9                      | $57.0 \pm 1.0$ | $4.3 \pm 0.6$  | $53.3 \pm 8.2$  | +     | +     | + | +   | + | + | ++  | ++ | +/- | +  | Dark  |
| P32-G7                      | $47.0 \pm 5.4$ | $3.0 \pm 0.0$  | $10.0 \pm 3.4$  | +     | +     | + | +   | + | + | ++  | ++ | +   | +  | Dark  |
| P35-B12                     | $47.0 \pm 4.4$ | $3.0 \pm 0.0$  | $10.0 \pm 3.4$  | +     | +     | + | -/+ | + | + | -   | -  | -   | -  | Light |
| P35-C12                     | $49.0 \pm 3.5$ | $3.0 \pm 0.0$  | $12.0 \pm 5.4$  | +     | +     | + | +   | + | + | +++ | ++ | +   | +  | Dark  |
| P62-H6                      | $44.3 \pm 3.4$ | $7.3 \pm 0.6$  | $30.0 \pm 12.5$ | enhan | enhan | + | +   | + | + | ++  | ++ | +   | +  | Dark  |
| P75-A4                      | $53.3 \pm 2.5$ | $3.5 \pm 0.7$  | $33.3 \pm 14.2$ | delay | delay | + | +   | + | + | ++  | +  | +   | +  | Dark  |

|        |            |           |                |       |       |   |   |   |   |    |    |   |   |      |
|--------|------------|-----------|----------------|-------|-------|---|---|---|---|----|----|---|---|------|
| P83-A2 | 42.0 ± 1.1 | 3.0 ± 0.0 | 10.0 ± 3.4     | +     | +     | + | + | + | + | ++ | ++ | + | + | Dark |
| P93-A4 | 47.3 ± 6.6 | 5.0 ± 1.3 | 34.0 ±<br>13.9 | enhan | enhan | + | + | + | + | ++ | +  | + | + | Dark |

<sup>1</sup> Swim-migration assay was measured after 48 h incubation at 28 C and swim-migration medium contained 0.3% Bactoagar. Values represent the average swim ring diameter with the standard deviation indicated by ±. Results are the average of 3 measurements per independent experiment.

<sup>2</sup> Swarm-migration medium contained 1.25 % Bactoagar and swarm ring diameter was measured at 48 h incubation at 28 C. Values represent the average swim or swarm ring diameter with the standard deviation indicated by ±. Results are the average of 3 measurements per independent experiment.

<sup>3</sup> N.D., not determined

<sup>4</sup> Insect pathogenesis was determined on *G. mellonella* larvae as described in the Methods. LT<sub>50</sub> and LT<sub>100</sub> values represent the time (h) required to kill 50 and 100% of larvae to die. Numerical values are given for parental wild type and secondary-phase.

Symbols: (Enhan) enhanced LT<sub>50</sub> and LT<sub>100</sub> values that are < 5 h from the parental wild type value; (Delay) delayed LT<sub>50</sub> and LT<sub>100</sub> values that are > 5 h from the parental wild type value; and (+) LT<sub>50</sub> and LT<sub>100</sub> values that are similar to the parental wild type value.

<sup>5</sup> Symbiosis was determined by the nematode assay and determined by the development of mature IJs. Symbols represent: (+) capable of normal nematode development similar to the parental wild type, (-) incapable of supporting nematode development, (enhan)

enhanced, nematode development occurred 2 days earlier than parental wild type, and (delay) delayed, nematode development occurred 2 days later than parental wild type.

<sup>6</sup>Dye absorption on EMB and MacConkey plates were noted at 48 h. A positive result on EMB plates was indicated by metallic green colonies, and a negative result by dull purple colonies. A positive result on MacConkey plates was indicated by bright red colonies and a negative result by colorless or pink colonies.

<sup>7</sup>DNase and Protease activities were determined by measuring the size of the halo (mm) surrounding the bacterial colony, 24 h after inoculation. Hyper positive (++++) > 4 mm halo, strongly positive (++) 2-4 mm halo, positive (+) 1-2 mm halo, weakly positive (-/+) < 1 mm halo, and negative (-) no halo. Hemolytic activity was determined by clearing zones around the bacterial colony. Strong annular hemolysis (+), weakly positive (-/+) and negative (-) no hemolysis. Antibiotic production was determined by measuring the size of the halo (mm) surrounding the bacterial colony, 1 day after inoculation of the tester bacterium (*Micrococcus luteus*). Strongly positive (++) > 5 mm halo, positive (+) 2-5 mm halo, weakly positive (-/+) < 2 mm halo, and negative (-) no halo.



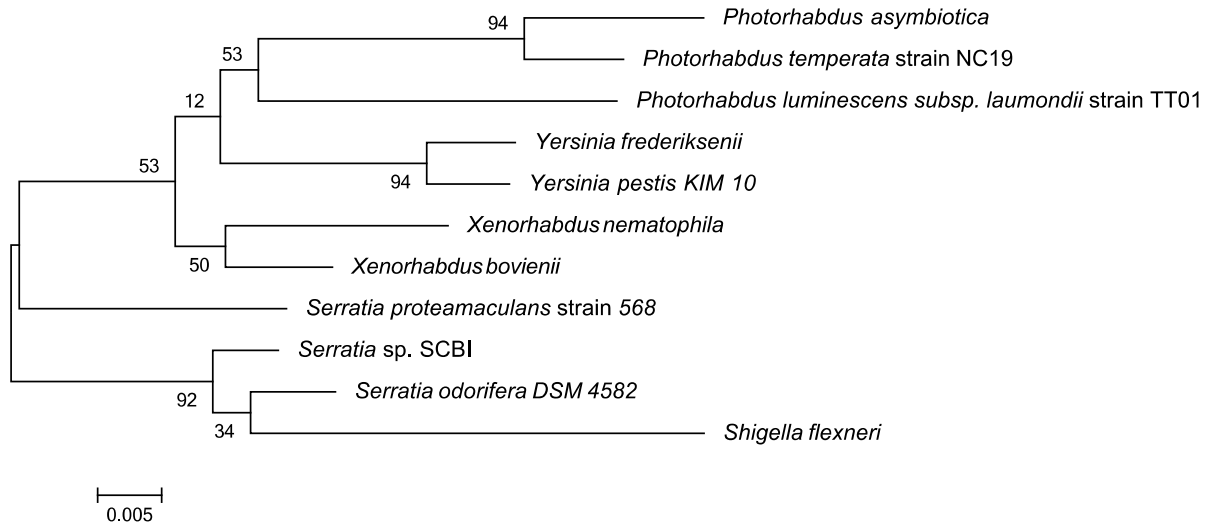

**Figure S1.** Maximum-likelihood phylogenetic tree of the 16S rDNA for *P. temperata* and closely related species. The percentage of replicate trees in which the associated taxa clustered together in the bootstrap test (1000 replicates) are shown next to the branches (1). The tree is drawn to scale, with branch lengths in the same units as those of the evolutionary distances used to infer the phylogenetic tree.

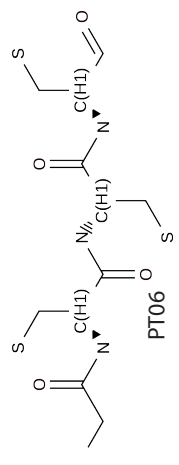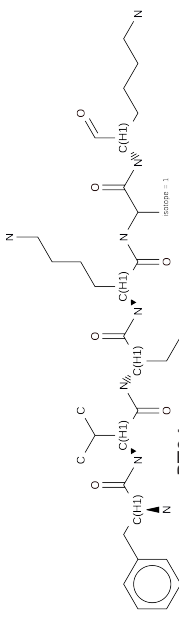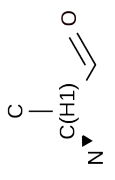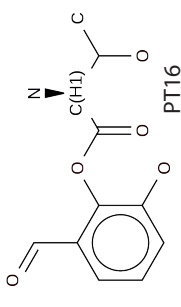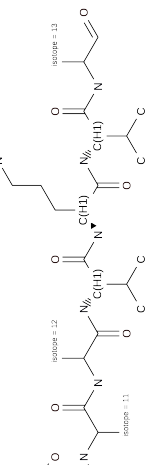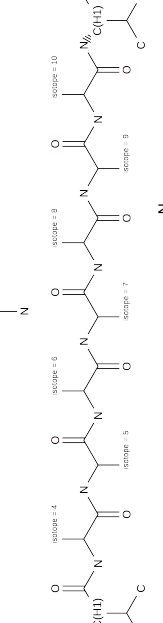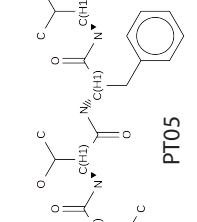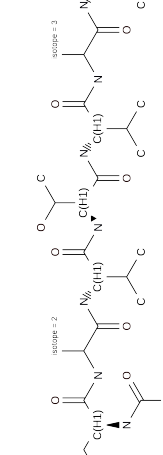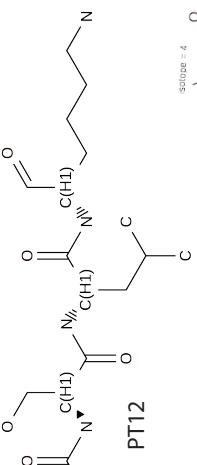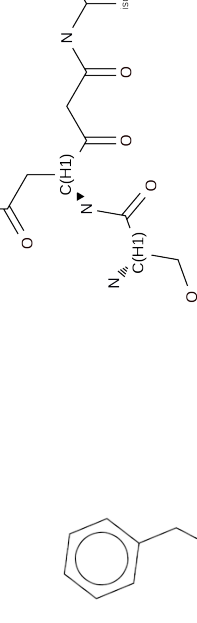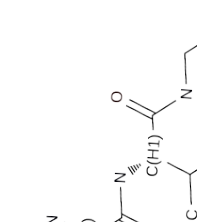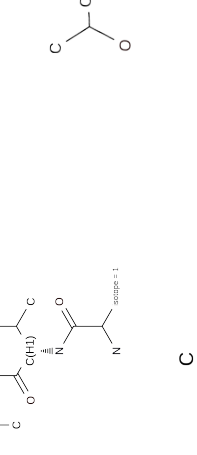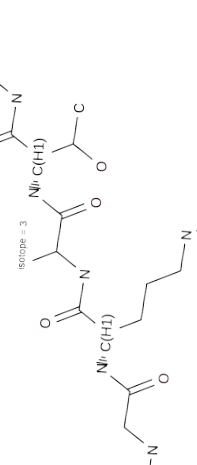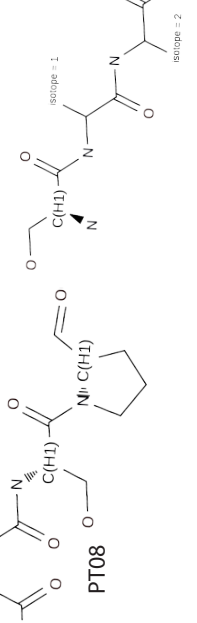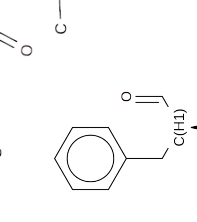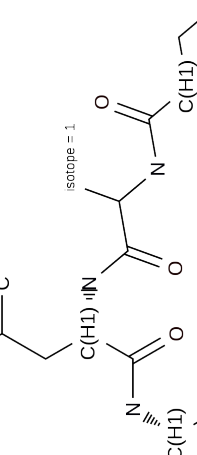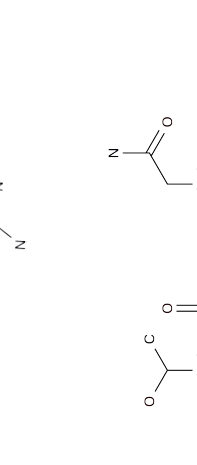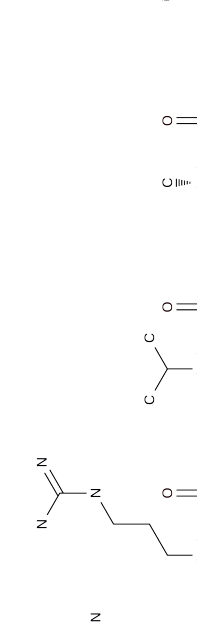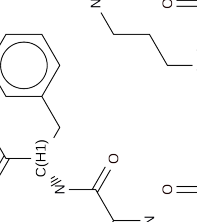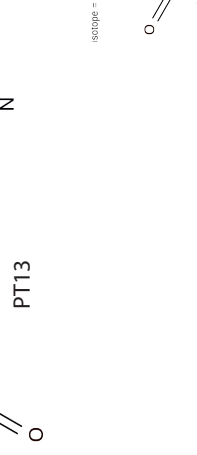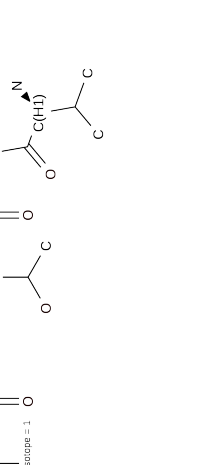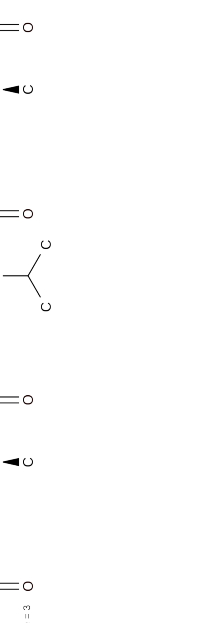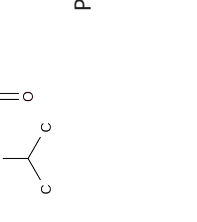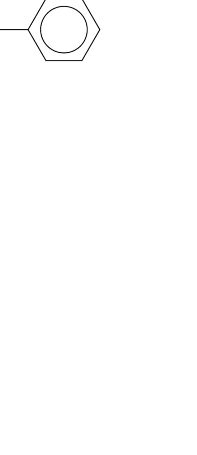

**Figure S2.** Predicted *Photorhabdus* chemical structures based on bioinformatic analysis of *Photorhabdus* biosynthetic gene clusters. Compound numbers correlate with the “Predicted structure” data in Table 2.

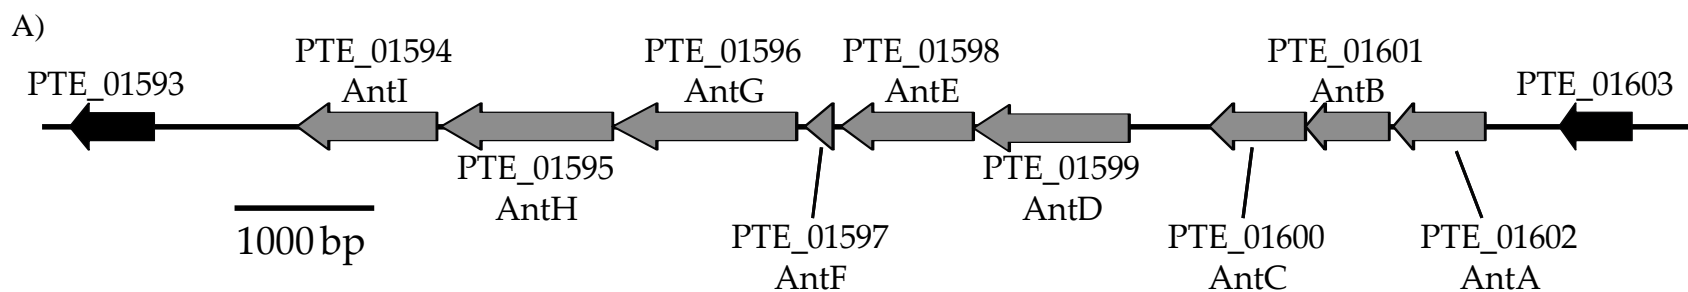

B)

| AA% identity          | AntI (plu4186)               | AntH (plu4187)               | AntG (plu4188)               | AntF (plu4189)               | AntE (plu4190)               | AntD (plu4191)               | AntC (plu4192)               | AntB (plu4193)               | AntA (plu4194)               |
|-----------------------|------------------------------|------------------------------|------------------------------|------------------------------|------------------------------|------------------------------|------------------------------|------------------------------|------------------------------|
| <i>P. asymbiotica</i> |                              |                              |                              | PAU_01705<br>(24%; 47% +ive) | PAU_01706<br>(30%; 50% +ive) | PAU_01706<br>(37%; 56% +ive) |                              |                              | PAU_01704<br>(30%; 51% +ive) |
| <i>P. temperata</i>   | PTE_01594<br>(87%; 94% +ive) | PTE_01595<br>(77%; 89% +ive) | PTE_01596<br>(87%; 95% +ive) | PTE_01597<br>(83%; 93% +ive) | PTE_01598<br>(83%; 93% +ive) | PTE_01599<br>(88%; 94% +ive) | PTE_01600<br>(91%; 94% +ive) | PTE_01601<br>(84%; 92% +ive) | PTE_01602<br>(91%; 97% +ive) |

**Figure S3.** The *antABCDEFGHI* locus in *P. temperata* NC19. (A) Map of the genes involved in anthraquinone biosynthesis. (B) Amino acid sequence identity between anthraquinone biosynthetic proteins found in *P. luminescens* TTO1.

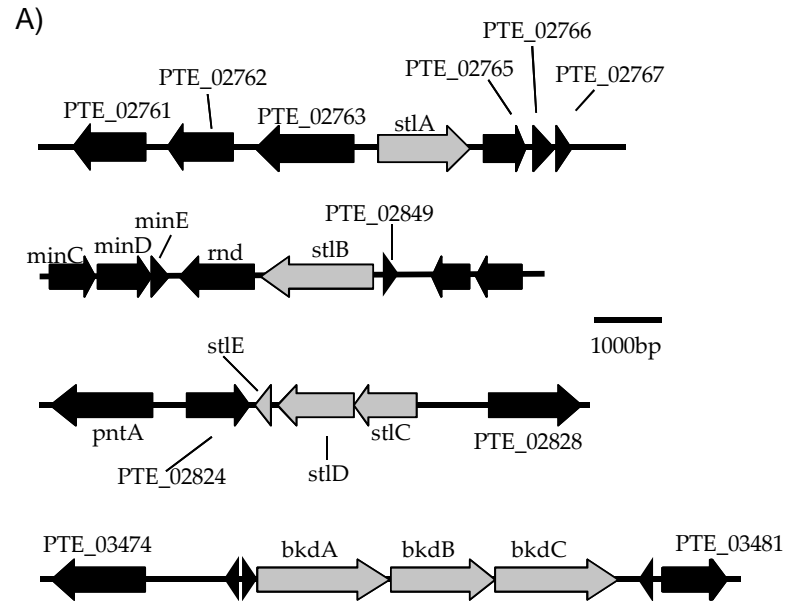

B)

| AA % identity         | BkdA (plu1883)            | BkdB (plu1884)            | BkdC (plu1885)            | stlA (plu2234)            | stlB (plu2134)            | stlC (plu2163)            | stlD (plu2164)            | stlE (plu2165)            |
|-----------------------|---------------------------|---------------------------|---------------------------|---------------------------|---------------------------|---------------------------|---------------------------|---------------------------|
| <i>P. temperata</i>   | PTE_03477 (94%; 97% +ive) | PTE_03478 (83%; 89% +ive) | PTE_03479 (91%; 96% +ive) | PTE_02764 (93%; 97% +ive) | PTE_02848 (94%; 97% +ive) | PTE_02827 (85%; 91% +ive) | PTE_02826 (96%; 97% +ive) | PTE_02825 (85%; 91% +ive) |
| <i>P. asymbiotica</i> | PAU_02673 (95%; 98% +ive) | PAU_02672 (87%; 90% +ive) | PAU_02671 (89%; 94% +ive) | PAU_02187 (89%; 95% +ive) | PAU_02433 (93%; 97% +ive) | PAU_02402 (80%; 90% +ive) | PAU_02401 (85%; 92% +ive) | PAU_02400 (88%; 91% +ive) |

**Figure S4.** The genetic loci involved in stilbene production in *P. temperata* NC19. (A) Map of the genes involved in stilbene biosynthesis. (B) Amino acid sequence identity between stilbene biosynthetic proteins found in *P. luminescens* TTO1. Eight genes presented are not expected to be sufficient for stilbene production. Other genetic loci are also involved, but these genes have not been fully described (see ref. 2). These loci are not grouped together on the chromosome suggesting independent regulation.

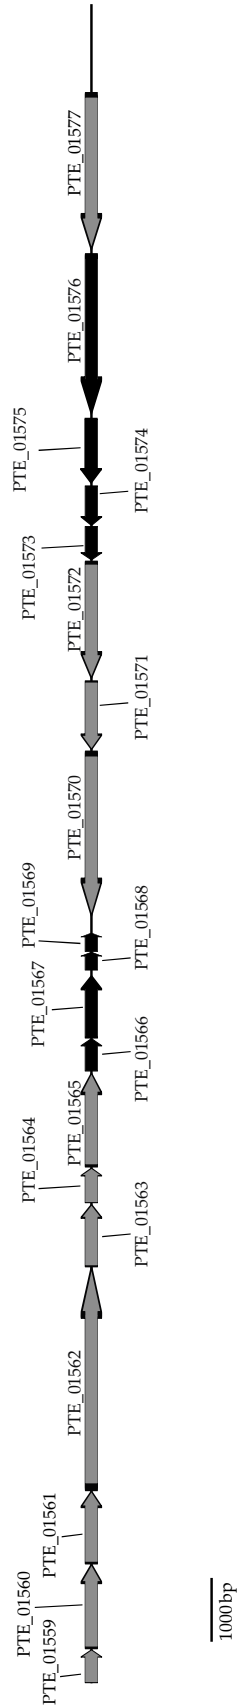

| <i>P. temperata</i><br>Locus Tag | Gene Name <sup>a</sup> | <i>P. luminescens</i><br>Locus Tag | AA%<br>identity | <i>P. asymbiotica</i><br>Locus Tag | AA%<br>identity |
|----------------------------------|------------------------|------------------------------------|-----------------|------------------------------------|-----------------|
| PTE_01577                        | vgrG                   | plu0355                            | 34              | PAU_03805                          | 89.3            |
| PTE_01576                        | -                      | -                                  | -               | PAU_03804                          | 88.8            |
| PTE_01575                        | -                      | -                                  | -               | PAU_03803                          | 81.8            |
| PTE_01574                        | -                      | -                                  | -               | PAU_03802                          | 90.5            |
| PTE_01573                        | impF                   | plu3222                            | 29              | PAU_03801                          | 80.2            |
| PTE_01572                        | COG3519                | plu0369                            | 27              | PAU_03800                          | 91.6            |
| PTE_01571                        | COG3520                | plu2296                            | 26              | PAU_03799                          | 87.3            |
| PTE_01570                        | clpV1                  | plu2287                            | 46              | PAU_03798                          | 89.4            |
| PTE_01569                        | -                      | plu0444                            | 40              | PAU_02212                          | 71.4            |
| PTE_01568                        | -                      | plu0441                            | 59              | -                                  | -               |
| PTE_01567                        | -                      | plu0367                            | 27              | PAU_03793                          | 77.8            |
| PTE_01566                        | -                      | plu2299                            | 23              | PAU_03792                          | 90.6            |
| PTE_01565                        | iglB                   | plu2300                            | 47              | PAU_03791                          | 96.4            |
| PTE_01564                        | iglA                   | plu2301                            | 40              | PAU_03790                          | 95.1            |
| PTE_01563                        | ImpA                   | plu2292                            | 31              | PAU_03789                          | 78.9            |
| PTE_01562                        | icmf                   | plu0359                            | 24              | PAU_03788                          | 87.9            |
| PTE_01561                        | dotU                   | plu0364                            | 35              | PAU_03787                          | 87.1            |
| PTE_01560                        | COG3522                | plu0365                            | 30              | PAU_03786                          | 88              |
| PTE_01559                        | COG3521                |                                    |                 | PAU_03785                          | 76.4            |

**Figure S5.** Organization of T6SS operon 1. The genes involved in T6SS are shown in gray and flanking genes in black. (Table) Amino acid sequence identity between T6SS proteins found in *P. temperata* with *P. luminescens* and *P. asymbiotica*, respectively.

<sup>a</sup>Nomenclature based on (3).

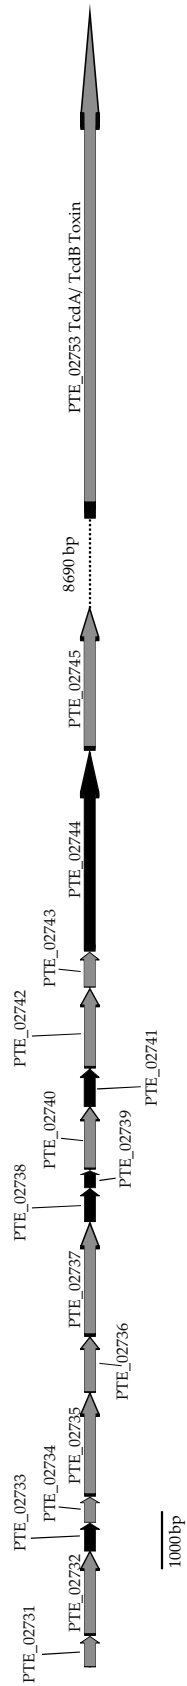

| <i>P. temperata</i><br>Locus Tag | Gene Name | <i>P. luminescens</i><br>Locus Tag | AA%<br>identity | <i>P. asymbiotica</i><br>Locus Tag | AA%<br>identity |
|----------------------------------|-----------|------------------------------------|-----------------|------------------------------------|-----------------|
| PTE_02176                        | icmf      | plu0359                            | 86              | PAU_00275                          | 90.2            |
| PTE_02175                        | COG3515   | plu0360                            | 83.9            | PAU_00276                          | 87.7            |
| PTE_02174                        | VasI      | plu0361                            | 87.5            | PAU_00277                          | 86.1            |
| PTE_02173                        | -         | plu0362                            | 92.5            | PAU_00278                          | 92.1            |
| PTE_02172                        | clpV1     | plu0363                            | 93.8            | PAU_00279                          | 94.9            |
| PTE_02171                        | dotU      | plu0364                            | 87.1            | PAU_00280                          | 89.1            |
| PTE_02170                        | COG3522   | plu0365                            | 83.3            | PAU_00281                          | 85.3            |
| PTE_02169                        | COG3521   | plu0366                            | 94.1            | PAU_00282                          | 92              |
| PTE_02168                        | fhaI      | plu0367                            | 92.3            | PAU_00283                          | 91.4            |
| PTE_02167                        | COG3520   | plu0368                            | 89              | PAU_00284                          | 89.8            |
| PTE_02166                        | COG3519   | plu0369                            | 85.7            | PAU_00285                          | 89.4            |
| PTE_02165                        | COG3518   | plu0370                            | 91.1            | PAU_00286                          | 95.2            |
| PTE_02164                        | iglB      | plu0371                            | 98.4            | PAU_00287                          | 98.8            |
| PTE_02163                        | iglA      | plu0372                            | 97              | PAU_00288                          | 96.4            |
| PTE_02162                        | -         |                                    |                 |                                    |                 |
| PTE_02161                        | Hcp1      | plu0373                            | 97.1            | PAU_00289                          | 97.1            |



**Figure S6.** Organization of T6SS operon 2. The genes involved in T6SS are shown in gray and flanking genes in black. (Table) Amino acid sequence identity between T6SS proteins found in *P. temperata* with *P. luminescens* and *P. asymbiotica*, respectively.

<sup>a</sup>Nomenclature based on (3)

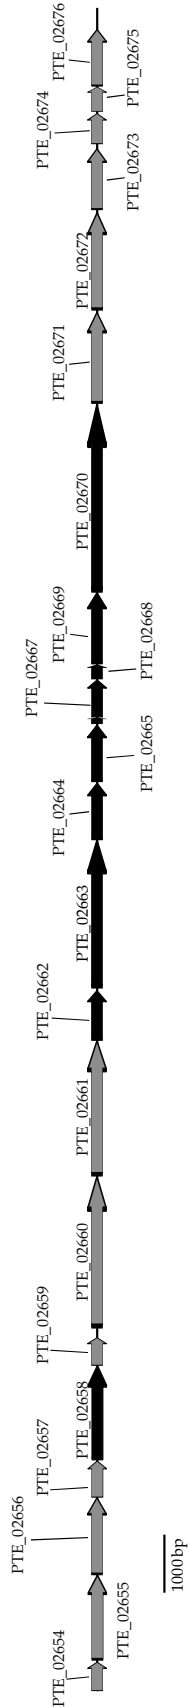

| <i>P. temperata</i><br>Locus Tag | Gene Name | <i>P. luminescens</i><br>Locus Tag | AA%<br>identity | <i>P. asymbiotica</i><br>Locus Tag | AA%<br>identity |
|----------------------------------|-----------|------------------------------------|-----------------|------------------------------------|-----------------|
| PTE_02676                        | COG3515   | plu4198                            | 75.4            | PAU_03814                          | 76.6            |
| PTE_02675                        | COG3518   | plu3222                            | 77.1            | PAU_03815                          | 87.5            |
| PTE_02674                        | COG3521   | plu4200                            | 82.6            | PAU_03816                          | 88.5            |
| PTE_02673                        | COG3520   | plu4201                            | 81.4            | PAU_03817                          | 83.5            |
| PTE_02672                        | COG3519   | plu4202                            | 86.6            | PAU_03818                          | 90.8            |
| PTE_02671                        | COG3515   | plu4203                            | 78.1            | PAU_03819                          | 79.6            |
| PTE_02670                        | -         | plu4214                            | 77.8            | PAU_03820                          | 76.2            |
| PTE_02669                        | -         | -                                  | -               | -                                  | -               |
| PTE_02668                        | -         | -                                  | -               | -                                  | -               |
| PTE_02667                        | -         | -                                  | -               | -                                  | -               |
| PTE_02666                        | -         | -                                  | -               | -                                  | -               |
| PTE_02665                        | -         | -                                  | -               | -                                  | -               |
| PTE_02664                        | -         | -                                  | -               | -                                  | -               |
| PTE_02663                        | -         | -                                  | -               | -                                  | -               |
| PTE_02662                        | -         | -                                  | -               | -                                  | -               |
| PTE_02661                        | vgrG      | plu4222                            | 74.5            | PAU_03831                          | 70.2            |
| PTE_02660                        | ClpV1     | plu4223                            | 83.6            | PAU_03832                          | 82              |
| PTE_02659                        | Hcp1      | plu4211                            | 92.6            | PAU_03056                          | 96.9            |
| PTE_02658                        | -         | plu4224                            | 69.8            | PAU_03834                          | 76.4            |
| PTE_02657                        | dotU      | plu4225                            | 68.1            | PAU_03835                          | 78.5            |
| PTE_02656                        | COG3522   | plu4226                            | 86.7            | PAU_03836                          | 90.5            |
| PTE_02655                        | iglB      | plu3261                            | 89.3            | PAU_03837                          | 91.7            |
| PTE_02654                        | iglA      | plu3262                            | 84              | PAU_03061                          | 93.9            |

**Figure S7.** Organization of T6SS operon 3. The genes involved in T6SS are shown in gray and flanking genes in black. (Table) Amino acid sequence identity between T6SS proteins found in *P. temperata* with *P. luminescens* and *P. asymbiotica*, respectively.

<sup>a</sup>Nomenclature based on (3)

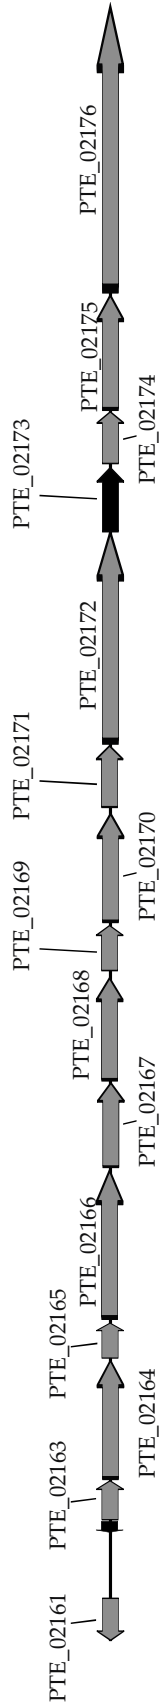

1000 bp

| <i>P. temperata</i><br>Locus Tag | Gene Name | <i>P. luminescens</i><br>Locus Tag | AA%<br>identity | <i>P. asymbiotica</i><br>Locus Tag | AA%<br>identity |
|----------------------------------|-----------|------------------------------------|-----------------|------------------------------------|-----------------|
| PTE_02745                        | ClpV1     | plu2287                            | 92.1            | PAU_02268                          | 90.4            |
| PTE_02744                        | -         | plu2288                            | 83.4            | PAU_02269                          | 80.2            |
| PTE_02743                        | dotU      | plu2289                            | 84.5            | PAU_02270                          | 86              |
| PTE_02742                        | COG3522   | plu2290                            | 91.8            | PAU_02271                          | 89.9            |
| PTE_02741                        | -         | plu2291                            | 82.2            | PAU_02272                          | 86.7            |
| PTE_02740                        | COG3515   | plu2292                            | 81.7            | PAU_02273                          | 80.4            |
| PTE_02739                        | -         | plu2293                            | 97              | PAU_02274                          | 98              |
| PTE_02738                        | -         | plu2294                            | 85.1            | PAU_02275                          | 86.1            |
| PTE_02737                        | vgrG      | plu2295                            | 90.9            | PAU_02276                          | 91.5            |
| PTE_02736                        | COG3520   | plu2296                            | 80              | PAU_02277                          | 83              |
| PTE_02735                        | COG3519   | plu2297                            | 91.7            | PAU_02278                          | 89.9            |
| PTE_02734                        | COG3518   | plu2298                            | 91.8            | PAU_02279                          | 89.7            |
| PTE_02733                        | -         | plu2299                            | 93.3            | PAU_02280                          | 98.8            |
| PTE_02732                        | iglB      | plu2300                            | 96.8            | PAU_02281                          | 95.9            |
| PTE_02731                        | iglA      | plu2301                            | 93.1            | PAU_02282                          | 93.7            |

**Figure S8.** Organization of T6SS operon 4. The genes involved in T6SS are shown in gray and flanking genes in black. (Table) Amino acid sequence identity between T6SS proteins found in *P. temperata* with *P. luminescens* and *P. asymbiotica*, respectively.

<sup>a</sup>Nomenclature based on (3)

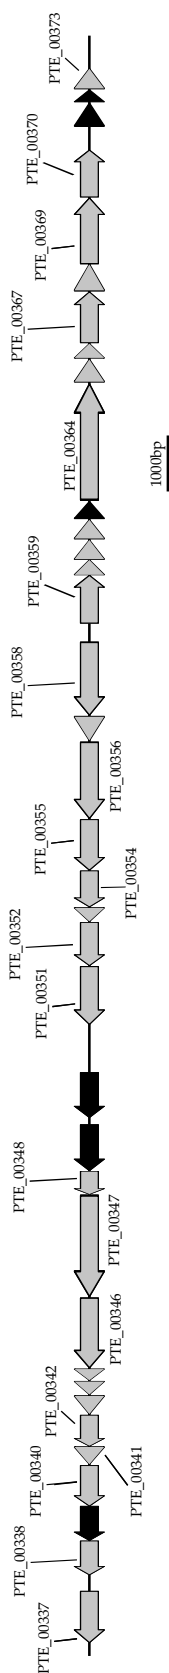

| <i>P. temperata</i> | Annotated Product                               | <i>P. luminescens</i><br>(% identity) | <i>P. asymbiotica</i><br>(% identity) |
|---------------------|-------------------------------------------------|---------------------------------------|---------------------------------------|
| PTE_00337           | <b>YopT-like peptidase</b>                      | plu3788 (83%)                         | PAU_02096 (76%)                       |
| PTE_00338           | apparatus protein, HrpE/YscL family             | plu3787 (93.2%)                       | PAU_01029 (94.1%)                     |
| PTE_00340           | apparatus lipoprotein, YscJ/HrcJ family         | plu3785 (95.9%)                       | PAU_01031 (94.3%)                     |
| PTE_00341           | major needle protein, YscF/MxiH/PrgI family     | plu3784 (87.5%)                       | PAU_01032 (88.4%)                     |
| PTE_00342           | <b>effector, YopR family</b>                    | plu3783 (73.9%)                       | PAU_01033 (73.4%)                     |
| PTE_00343           | protein, YscG family                            | plu3782 (94%)                         | PAU_01034 (94.8%)                     |
| PTE_00344           | major needle protein, YscF/MxiH/PrgI family     | plu3781 (82.1%)                       | PAU_01035 (79.3%)                     |
| PTE_00345           | protein, YseE family                            | plu3780 (90.3%)                       | PAU_01035                             |
| PTE_00346           | apparatus protein, YscD/HrpQ family             | plu3779 (87.7%)                       | PAU_01036 (87.5%)                     |
| PTE_00347           | outer membrane pore, YscC/HrcC family           | plu3778 (89.6%)                       | PAU_01037 (87.9%)                     |
| PTE_00348           | chaperone, YscB family                          | plu3777 (90.7%)                       | PAU_01038 (81.4%)                     |
| PTE_00351           | protein, YscU/HrpY family                       | plu3774 (94.6%)                       | PAU_01045 (94%)                       |
| PTE_00352           | protein SpaR/YscT/HrcT                          | plu3773 (93.4%)                       | PAU_01046 (91.9%)                     |
| PTE_00353           | protein, HrpO family                            | plu3772 (97.7%)                       | PAU_01047 (96.6%)                     |
| PTE_00354           | apparatus protein, YscR/HrcR family             | plu3771 (96.8%)                       | PAU_01048 (96.3%)                     |
| PTE_00355           | apparatus protein YscQ/HrcQ                     | plu3770 (83.9%)                       | PAU_01049 (84.1%)                     |
| PTE_00356           | needle length determinant                       | plu3769 (%)                           | PAU_01050                             |
| PTE_00357           | protein YscO.                                   | plu3768 (89.5%)                       | PAU_01051 (85%)                       |
| PTE_00358           | ATPase, FliI/YscN (EC 3.6.3.15)                 | plu3767 (98.2%)                       | PAU_01052 (97.5%)                     |
| PTE_00359           | outer membrane protein PopN                     | plu3766 (94.8%)                       | PAU_01053 (84.9%)                     |
| PTE_00360           | <b>effector delivery regulator, TyeA family</b> | plu3765 (93.7%)                       | PAU_01053 (85.1%)                     |
| PTE_00361           | chaperone SycN                                  | plu3764 (95.9%)                       | PAU_01054 (86.2%)                     |
| PTE_00362           | protein, YscX family                            | plu3763 (90.1%)                       | PAU_01055 (88.4%)                     |
| PTE_00364           | protein, HrcV family                            | plu3761 (95.9%)                       | PAU_01057 (95%)                       |
| PTE_00365           | regulator LcrR                                  | plu3760 (92.3%)                       | PAU_01058 (90.1%)                     |
| PTE_00366           | protein LcrG                                    | plu3759 (93.5%)                       | PAU_01059 (83.7%)                     |
| PTE_00367           | translocon protein, LcrV/PcrV family            | plu3758 (80.2%)                       | PAU_01060 (70.1%)                     |
| PTE_00368           | low calcium response chaperone LcrH/SycD        | plu3757 (95.8%)                       | PAU_01061 (90.5%)                     |
| PTE_00369           | translocon protein, YopB/IpaB/SipB family       | plu3756 (75.3%)                       | PAU_01062 (75.2%)                     |
| PTE_00370           | translocon protein, YopD/IpaC/EspB family       | plu3755 (74.5%)                       | PAU_01063 (67.2%)                     |
| PTE_00373           | chaperone YscW                                  | plu3751 (82%)                         | PAU_01067 (71.5%)                     |

**Figure S9.** Conserved T3SS homologs with gene names and % amino acid identity. The genes involved in T3SS are shown in gray and flanking genes in black. Bold text represents T3SS effectors.

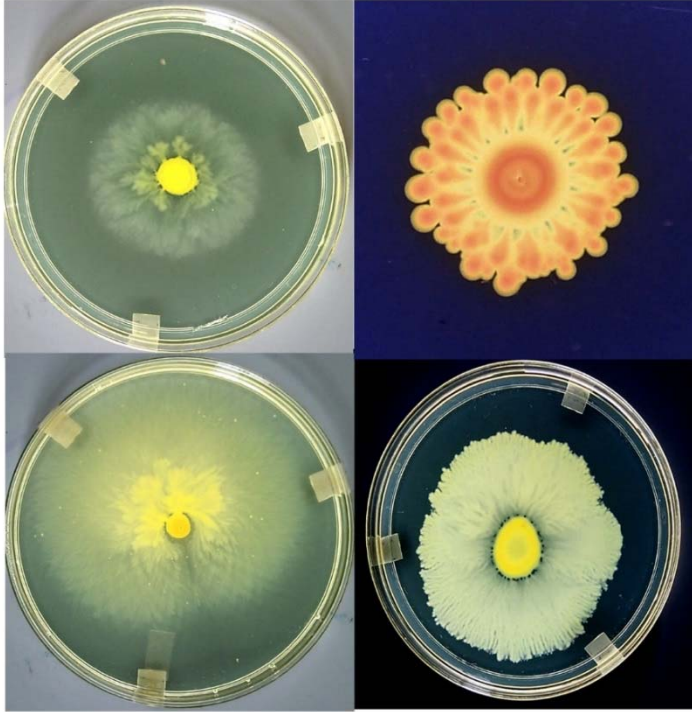

Figure S10. Hyperswarming mutants formed unique swarming patterns. Cells from an overnight broth culture (2 ul) were inoculated onto the surface of PP3 swarm plates (1.25% w/v agar) and incubated at 28°C for 24 h.



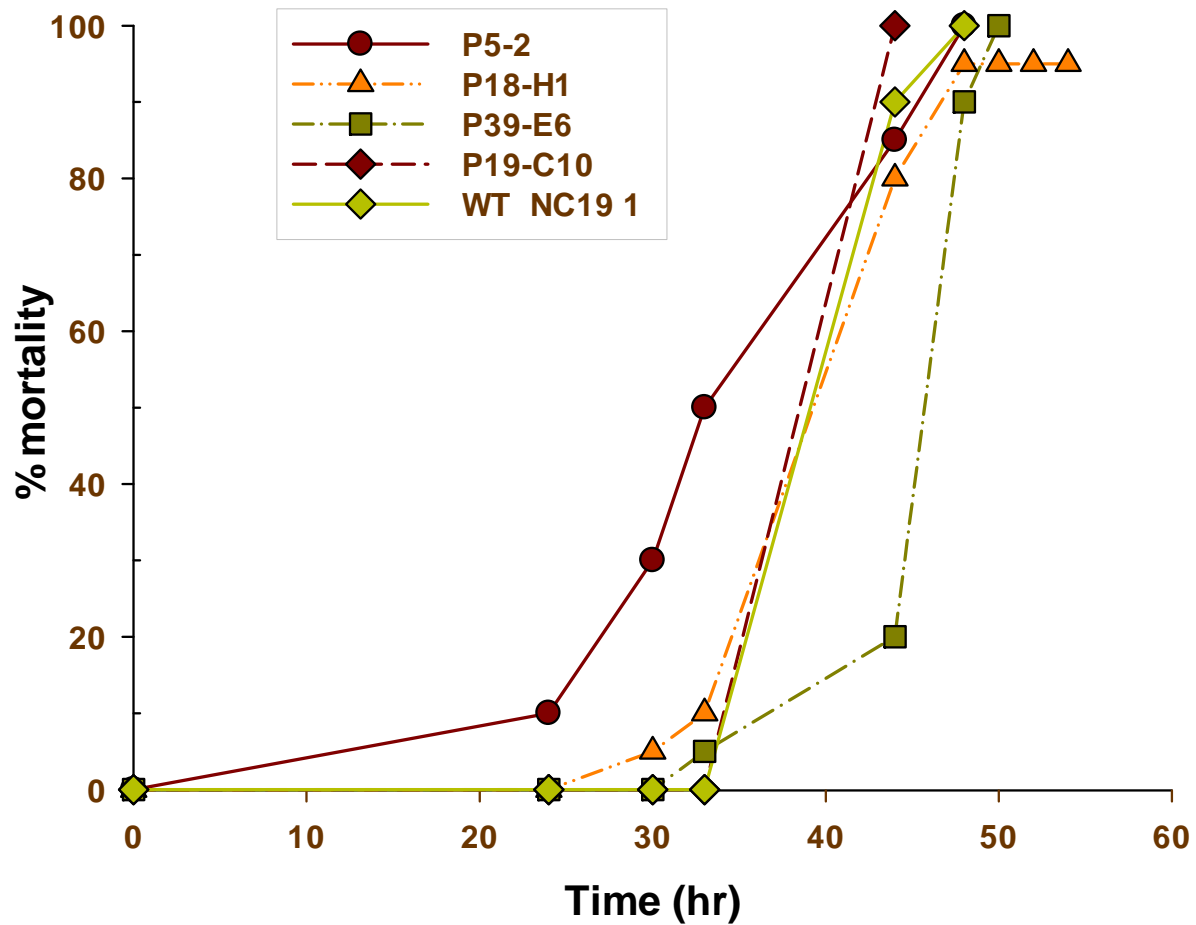

Figure S11. Insect pathogenesis assays revealed mutants with reduced and enhanced insect virulence. Lethal time was determined for each mutant by injecting 20 *G. mellonella* larvae. Insect health was monitored over time. The LT 50 value was defined as the time required for 50% of the larvae to die, while the LT100 value was defined as the time required for 100% mortality in this screen.

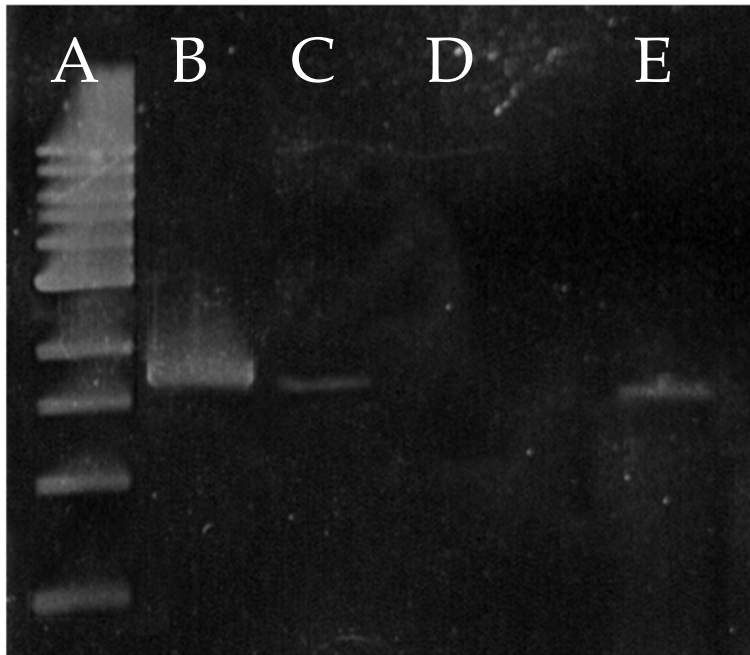

Figure S12. End-point RT-PCR confirmed the expression of *pte\_02637* gene in the genetically complemented P13-7 mutant. Panels: (A) 1 Kb marker ladder, (B) Control, wild type NC19 gDNA, (C) wild type NC19, (D) P13-7, (E) HNR1207 (P13-7 + pHR1)

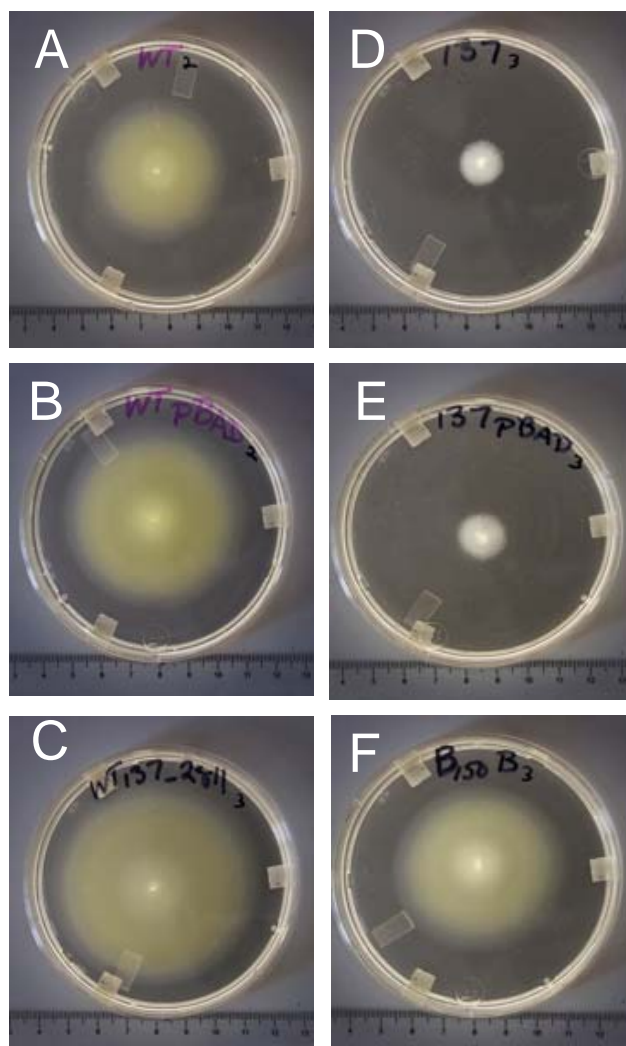

Figure S13. Genetic complementation restores swimming behavior in mutant P13-7. Swim migration plate assays were completed at 28°C for 48 h. Panels: (A) parental wild type NC 19 (B) HNR0018 (wild type NC19 + pBAD32), (C) HNR0606 (wild type NC19 + pHR1), (D) mutant P13-7, (E) HNR1318 (P13-7 + pBAD32), (F) HRN1307 (P13-7 + pHR1).

#### References

1. **Felsenstein J.** 1985. Confidence-Limits on Phylogenies - an Approach Using the Bootstrap. *Evolution* 39(4):783-791 doi:Doi 10.2307/2408678
2. **Joyce SA, Brachmann AO, Glazer I, Lango L, Schwar G, Clarke DJ, Bode HB.** 2008. Bacterial biosynthesis of a multipotent stilbene. *Angew Chem Int Edit* 47:1942-1945.
3. **Boyer F, Fichant G, Berthod J, Vandenbrouck Y, Attree I.** 2009. Dissecting the bacterial type VI secretion system by a genome wide in silico analysis: what can be learned from available microbial genomic resources? *BMC Genomics* 10:104.
